# Supplementary material for: Common clonal origin of chronic myelomonocytic leukemia and B-cell acute lymphoblastic leukemia in a patient with a germline CHEK2 variant
Source: PubMed Central journal article supplement — Cold Spring Harb Mol Case Stud. 2021 Jun;7(3):a006090. doi: 10.1101/mcs.a006090 (PMC8208041; doi:10.1101/mcs.a006090), 2021-06
Supplement: supp_mcs.a006090_Supplemental_Material.pdf [file supp_mcs.a006090_Supplemental_Material.pdf]

Supplemental Material

Supplemental Figure S1: *CHEK2* c.475T>C chromatograms

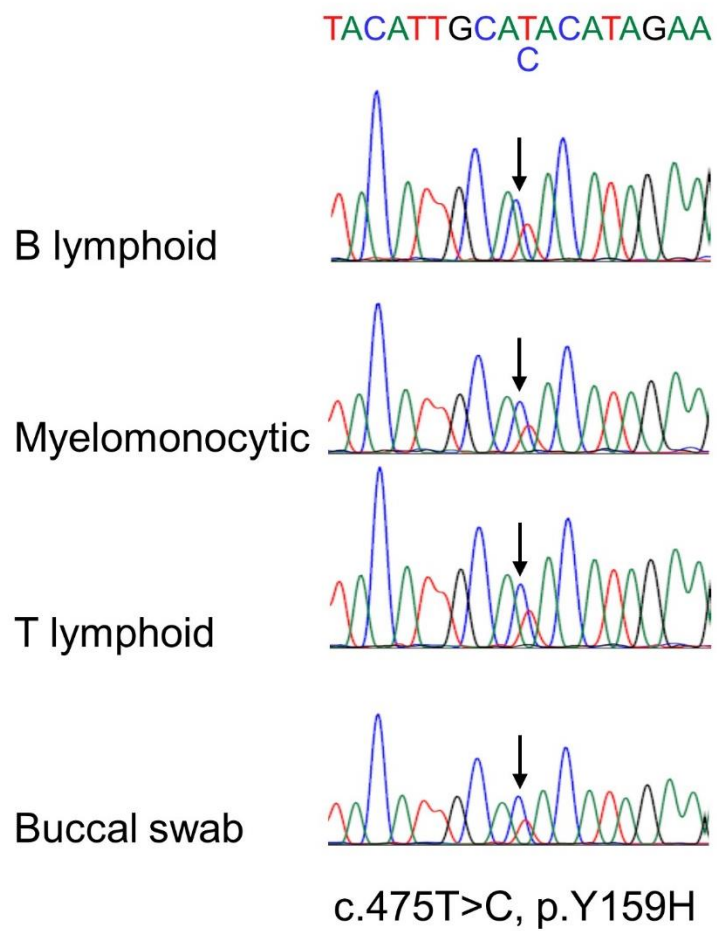

**Supplemental Figure S2: Cell sorting strategy**

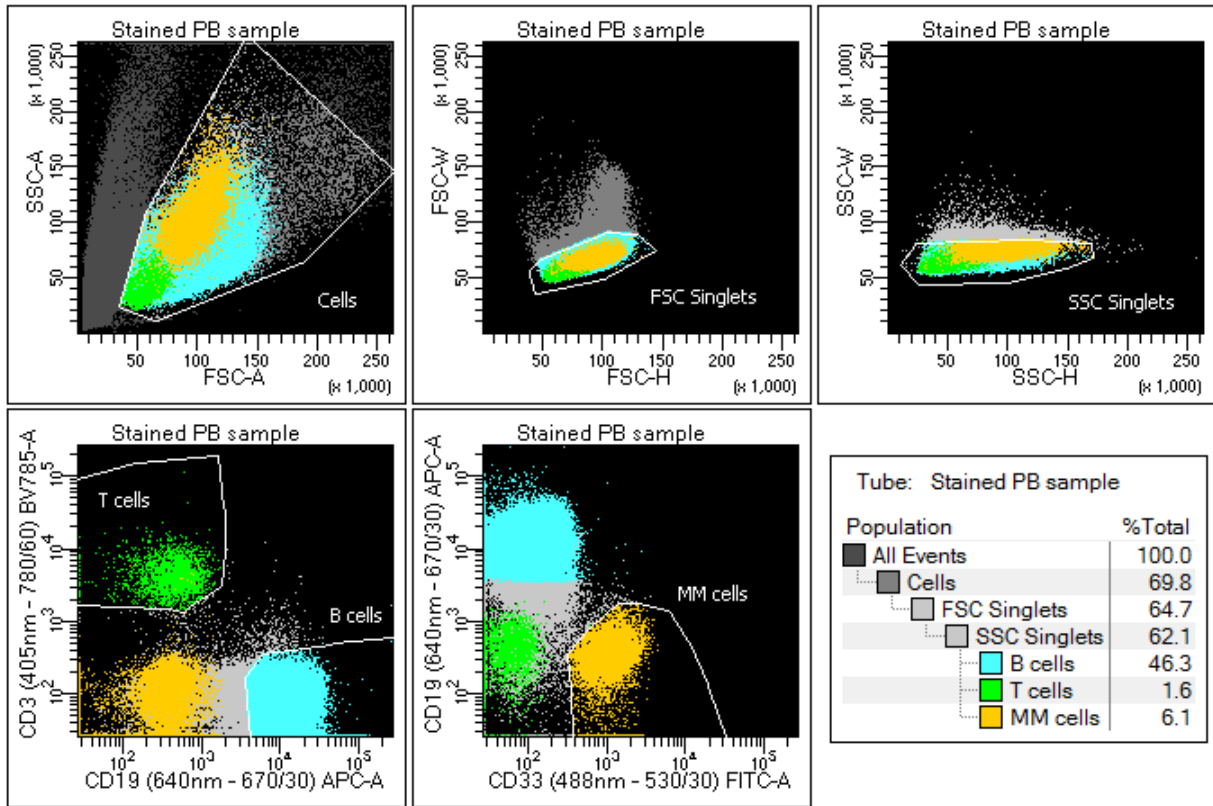

**Abbreviations:** APC, allophycocyanin; BV785, Brilliant Violet 785; FITC, fluorescein isothiocyanate; FSC, forward scatter; MM, myelomonocytic; PB, peripheral blood; SSC, side scatter.

**Supplementary Table S1: QuikChange oligonucleotides used to generate the CHK2 variants**

| <b>Variant</b> | <b>Oligonucleotide pair</b>                                                                                                     |
|----------------|---------------------------------------------------------------------------------------------------------------------------------|
| Y159H          | <b>F:</b> CCACTGTGATCTTCTATGTGTGCAATGTAAGAGTTTTTAGGAC<br><b>R:</b> GTCCTAAAAACTCTTACATTGCACACATAGAAGATCACAGTGG                  |
| I157T          | <b>F:</b> CTTCTATGTATGCAGTGTAAGAGTTTTTAGGACCCACTTCCC<br><b>R:</b> GGGAAAGTGGGTCCCTAAAAACTCTTACACTGCATACATAGAAG                  |
| H143Y          | <b>F:</b> TCCCTGAAAATCCGAAAATATTTCTTGCTGTATGTTCCGGTATTTATCTGTT<br><b>R:</b> AACAGATAAATACCGAACATACAGCAAGAAATATTTTCGGATTTTCAGGGA |
